# Supplementary material for: Does afforestation deteriorate haze pollution in Beijing–Tianjin–Hebei (BTH), China?
Source: Copernicus journal article supplement (doi:10.5194/acp-2017-1239), 2018-02-15
Supplement: Supplementary file [file acp-2017-1239-AC4-supplement.pdf]

### Reply to Anonymous Referee #3

We thank the reviewer for the careful reading of the manuscript and helpful comments. We have revised the manuscript following the suggestion, as described below.

#### General comments

**Comment:** This is a study of numerical test for model WRF-Chem. Five cases were simulated: (1) the basic case of real land cover in 2013; (2) the case with land cover of 2001; (3) the case with total afforestation; (4) the case with total deforestation; (5) the case with the so called "ventilation corridors" for Beijing. Real emission inventory was used. Results of air pollutants, mainly the PM<sub>2.5</sub> concentration, were displayed to show the influence of land cover change.

The major logic of this paper is: afforestation increases surface roughness, then decrease the wind speed, and then in turn, increase the haze concentration. The numerical experiments support this inference, and give quantitative results, although it is not significant for the formation of heavy haze in BTH area.

There is a basic problem in above inferring chain. Afforestation increases surface roughness may be true for flat terrain. But in this study of BTH area, afforestation is mainly over mountains (Taihang and Yanshan Mountains). Large uncertainty still exists in parameterization of air - land interaction over complex terrain. In addition to the effect of vegetation, drag of subgrid features of topography should be considered (Jimenez and Dudhia, 2012). Therefore, effect of any change only in land cover (vegetation) may be well within the range of WRF model uncertainties. This paper presents a 6% PM<sub>2.5</sub> concentration change for the cases before/after afforestation. It can be regarded as a sensitivity test of the model, rather than a reliable result. (Reference: Jimenez PA, Dudhia J, 2012, Improving the representation of resolved and unresolved topographic effects on surface wind in the WRF model, Journal of Applied Meteorology & Climatology, 51(2): 300-316.)

**Response:** We have clarified in Section 3.3: *"It is worth noting that Jiménez and Dudhia (2012) have point out that there still exist large uncertainties in parameterizing the air land interaction over complex terrain. Besides the vegetation*

*effect on the roughness length, drag of subgrid features of topography need to be considered. The parameterization of orographic flow over complex terrain is a challengeable problem at the mesoscale numerical simulation. In early versions of the WRF model, a large bias in predicting surface winds over complex terrain has occurred due to the drag exerted by unresolved topography (Cheng and Steenburgh, 2005). Great efforts have been made to improve the simulation of orographic flow over complex terrain. The new parameterization scheme introduced in the WRF model since version 3.4.1 has corrected this high wind speed bias over plains and valleys (Mughal et al., 2017), and also corrected the low wind speed bias found over the mountains and hills (Jiménez and Dudhia, 2012)."*

Furthermore, we have clarified in Section 2.3: *"In order to more precisely simulate surface stress within the sub-grid scale in heterogeneous terrain, the effective roughness length has been extensively studied, especially in the 1990s. Claussen (1990) has defined the effective roughness length as a value of the area average of the roughness length in the heterogeneous terrain. The effective roughness length relies upon the blending height (Wieringa 1986; Mason 1988; Wood and Mason 1991; Philip 1996; Mahrt 1996), at which the flow is approximately in equilibrium with underlying surface conditions and independent of horizontal position (Ma and Daggupary 1998). We have modified the Noah SFz0 calculation using the spatial average of the vegetation roughness length."*

## **Other concerns**

**Comment (1):** MODIS land cover data, MCD12Q1, was assimilated to the WRF-Chem system. The model performance before and after the data assimilation should be provided.

**Response:** We have provided the validation of PM<sub>2.5</sub>, O<sub>3</sub>, NO<sub>2</sub>, SO<sub>2</sub>, and CO using the measurements at monitoring sites in BTH, and compared the simulated wind speed and direction, and planetary boundary layer height at monitoring sites with the reanalysis data from the European Centre for Medium-range Weather Forecasts (ECMWF) for the REF case (after the data assimilation). Comparisons have shown that the difference of the simulated air pollutants and meteorological parameters

between the SEN-AFF case (before the data assimilation) and the REF case is not significant, so the model performance for the SEN-AFF case is not provided further in the manuscript. We have clarified in Section 3.3: “*On average, the difference of the simulated air pollutants and meteorological parameters between the REF and SEN-AFF case is not significant.*”. In addition, please refer to **Comment (2)** about the validation for the meteorological parameters.

**Comment (2):** The performance of WRF on representing real meteorological data should be checked, in BTH area.

**Response:** We have clarified in Section 3.2: “*Considering the key role of meteorological fields in determining the formation, transformation, diffusion, transport, and removal of the air pollutants (Bei et al., 2017), Figure S2 presents the comparison of the simulated wind speed and direction, and planetary boundary layer height with the reanalysis data from ECMWF (European Centre for Medium-range Weather Forecasts) at monitoring sites. The predicted temporal variations of the three meteorological parameters are generally in agreement with the reanalysis data, with the IOAs exceeding 0.80, and the absolute NMB less than 25%.*”

**Comment (3):** About the simulation case for "ventilation corridors", the width of the corridors is 6 km, the horizontal resolution of the model is also 6 km. It is hard to resolve this fine structure for the model.

**Response:** We have clarified in detail in Section 3.3: “*For all the grid cells within the corridors, the barren surface with SFz0 of 0.01 m is used to replace other land cover categories.*”

**Comment (4):** How to calculate the wind field difference? Why there is the largest difference of wind in Beijing between the year 2013 and 2001? (Figure 5)

**Response:** We calculate the wind field difference by subtracting the simulated U and V components in SEN-AFF case from those in the REF case:  $U(\text{REF}) - U(\text{SEN-AFF})$

and  $V(\text{REF}) - V(\text{SEN-AFF})$ . The largest difference of winds in Beijing between the year 2013 and 2001 is caused by the rapid growth of forests in the west and in/on the north of Beijing compared to other regions in BTH, which causes the slowdown of the westerly or northerly wind appreciably.

### **Additional points**

**Comment:** Correspondent to Figure 4, a map of PM source emission is needed.

**Response:** We have included the emission distribution of OC, VOCs,  $\text{NO}_x$ , and  $\text{SO}_2$  in Figure S1. We have clarified in Section 2.2: *“Figure S1 shows the emission distribution of OC, VOCs,  $\text{NO}_x$ , and  $\text{SO}_2$  in the simulation domain. The high emissions of OC, VOCs,  $\text{NO}_x$ , and  $\text{SO}_2$  are generally concentrated in the plain region of BTH and Shandong province, the downwind area of afforestation.”*

**Comment:** Page 3: "afforestation is beneficial for the atmosphere to remove  $\text{O}_3$ ,  $\text{NO}_x$ ,  $\text{SO}_2$ , and  $\text{PM}_{2.5}$  through the dry deposition process (Zhang et al., 2015; 2017; Huang et al., 2016). Hence, a large artificial ventilation corridor system has been proposed, highly anticipated to ventilate Beijing (China forestry network, 2014, 2016b, c), but why in your corridor experiment the deforestation is used? (Page 12: "In the corridors, the barren surface with  $\text{SFz0}$  of 0.01 m is used to replace other land cover categories")

**Response:** We do not use the deforestation in the corridor. It is supposed that all the vegetation and buildings should be removed in the proposed corridor, so we use the barren surface with  $\text{SFz0}$  of 0.01 m in the corridor.

**Comment:** Page 4, line 90: "The accuracy of the IGBP layer of MCD12Q1 is estimated to be 72.3-77.4% globally", what about the accuracy in BTH area?

**Response:** We have clarified in Section 2.1: *“Great efforts have been made to evaluate the accuracies of the global land cover datasets over China. The overall accuracy of MCD12Q1 in China is estimated to be 55.9-68.9% (Bai et al., 2015;*

*Yang et al., 2017), which could be increased to about 70% when ignoring the differences of five forests.”*

**Comment:** Eq (5),  $G_f$  should be  $G_T$ ?

**Response:**  $G_f$  is not  $G_T$ , and we have clarified in Section 2.3: “ $G_f$  is the area fractional coverage of green vegetation, and  $G_T$ ,  $G_{min}$  and  $G_{max}$  are the threshold, minimal, and maximal value of  $G_f$ , respectively.”

**Comment:** Page 9, line 211: "The good agreements of the simulated mass concentrations of air pollutants with observations at monitoring sites in BTH show that the emission inventory used in present study and simulated wind fields are generally reasonable". Probably, but not sure. WRF is known for its overestimate of surface wind speeds, which is of importance for air pollution modeling. Here the "good agreements" of haze simulation may imply that other errors in the model have compensated this deficiency.

**Response:** We have provided validation for the meteorological parameters, including wind speed and direction, and planetary boundary layer height, and the predicted meteorological parameters are generally consistent with the reanalysis data. We have clarified in Section 3.2: “*It is worth noting that, although the predicted meteorological parameters are generally consistent with the reanalysis data from ECMWF at monitoring sites, other factors still affect the meteorological field simulations and cause biases to compensate some of the deficiencies of the WRF-CHEM model, such as overestimation of surface wind speeds.*”

**Comment:** Figure 3, details about the comparison. How the modelled concentration being calculated to compare to the observation? Using the nearest grid point to the observation site?

**Response:** Yes, we use the simulation of nearest grid point to the observation site to compare with the measurement.

**Comment:** Page 9, line 228-232, "The SFz0 change is highly correlated with the forest LCF change, with a correlation coefficient of 0.91, indicating that the afforestation is the most important factor for the increase in the SFz0 in BTH." This is just expected results! Need not to be "indicating".

**Response:** We have clarified in Section 3.3: *“The SFz0 change is highly correlated with the forest LCF change, with a correlation coefficient of 0.91. Generally, the SFz0 is mainly dependent upon the LCF (Equation 6), and sensitive to the forest change (Table S2). Therefore, afforestation constitutes the most important factor for the increase in the SFz0 in BTH.”*

**Comment:** Page 10, line 234, "The prevailing wind is decelerated...", what do prevailing wind mean here?

**Response:** We revised the sentence in Section 3.3: *“The prevailing westerly or northerly wind is decelerated...”*

**Comment:** Page 10, 239, "The PM<sub>2.5</sub> enhancement in Beijing is the most evident, corresponding to the rapid growth of forests in the west and in/on the north of Beijing". This is doubtful. How can the air pollution so sensitive to local change of land cover?

**Response:** We have concluded that afforestation does not play an important role in the haze pollution in BTH, enhancing PM<sub>2.5</sub> concentrations by up to 6% on average. Compared to other regions in BTH, the rapid growth of forests in the west and in/on the north of Beijing cause the slowdown of the westerly or northerly wind appreciably, unfavorable for dispersion of air pollutants. Therefore, the PM<sub>2.5</sub> enhancement in Beijing caused by afforestation is generally the most obvious.

## References

- Bai, Y., Feng, M., Jiang, H., Wang, J., and Liu, Y.: Validation of land cover maps in China using a sampling-based labeling approach, Remote SENS-BASEL, 7, 10589-10606, 2015.
- Cheng, W. Y. Y., and Steenburgh, W. J.: Evaluation of surface sensible weather forecasts by

the WRF and the Eta Models over the western United States, *Weather Forecast.*, 20, 812-821, 10.1175/waf885.1, 2005.

Jiménez, P. A., and Dudhia, J.: Improving the representation of resolved and unresolved topographic effects on surface wind in the WRF Model, *J. Appl. Meteorol. Clim.*, 51, 300-316, 2012.

Mughal, M. O., Lynch, M., Yu, F., McGann, B., Sutton, J., and Sutton, J.: Wind modelling, validation and sensitivity study using Weather Research and Forecasting model in complex terrain, *Environ. Modell. Softw.*, 90, 107-125, 2017.

Yang, Y., Xiao, P., Feng, X., and Li, H.: Accuracy assessment of seven global land cover datasets over China, *Isprs J. Photogramm.*, 125, 156-173, 2017.
